# Supplementary material
Source: publisher figshare collection journal article supplement (https://acs.figshare.com/ndownloader/files/14042402)
Supplement: Supplementary file 1 [file 14042402]

# Unveiled the Source of the Structural Instability of HKUST-1 Powders upon Mechanical Compaction: Definition of a Fully Preserving Tableting Method

## *AUTHOR NAMES*

*A. Terracina<sup>1,2</sup>, M. Todaro<sup>1</sup>, M. Mazaj<sup>3</sup>, S. Agnello<sup>1</sup>, F. M. Gelardi<sup>1</sup>, G. Buscarino<sup>1,\*</sup>*

## *AUTHOR ADDRESS*

<sup>1</sup>Dipartimento di Fisica e Chimica, Università di Palermo, 90123 Palermo, Italy

<sup>2</sup>Dipartimento di Fisica e Astronomia, Università di Catania, 95123 Catania, Italy

<sup>3</sup>National Institute of Chemistry, Hajdrihova 19, 1000 Ljubljana, Slovenia

\* Email: [gianpiero.buscarino@unipa.it](mailto:gianpiero.buscarino@unipa.it), web site: <http://www.unipa.it/lamp/>

**Table S1:** List of the main samples, with the description of the main treatments and the estimate of the water content.

| Name of the sample | Parent Material  | Reactivation post activation and/or tableting | Water content (number of water molecules for Cu <sup>2+</sup> ion) |
|--------------------|------------------|-----------------------------------------------|--------------------------------------------------------------------|
| Powder (Activated) | Activated Powder | 5 weeks later                                 | 0.6<br>(after being handled in air)                                |
| Tablet B           | Activated Powder | just after tableting                          | 0.67                                                               |
| Tablets A          | Activated Powder | 5 weeks later                                 | 1.0                                                                |
| Tablet H2-40MPa    | H2               | 5 weeks later                                 | 2.1                                                                |
| Tablet H1-40MPa    | H1               | NO                                            | 3.8                                                                |

## 1. IMAGES OF SOME OF THE SAMPLES

Figure S1 shows the HKUST-1 some of the obtained tablets, with a pressure of (a) 1, (b) 3, (c) 10, (d) 20 and (e) 40 MPa. The tablets look self-standing only starting from 30 MPa upwards.

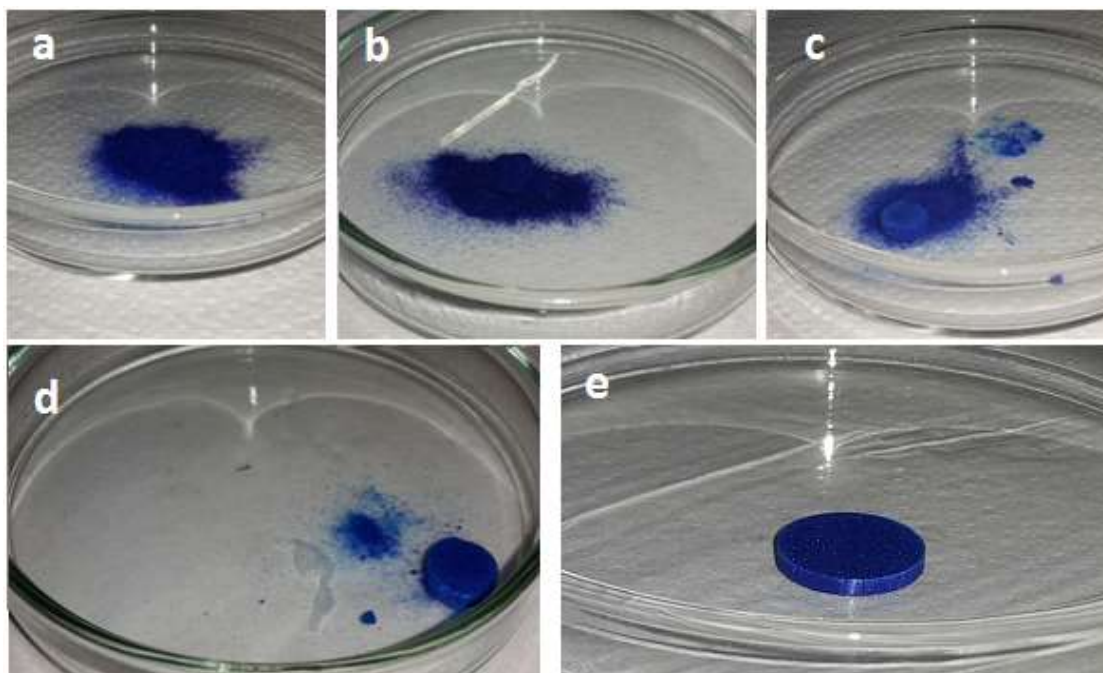

**Figure S1** - A-type tablets.

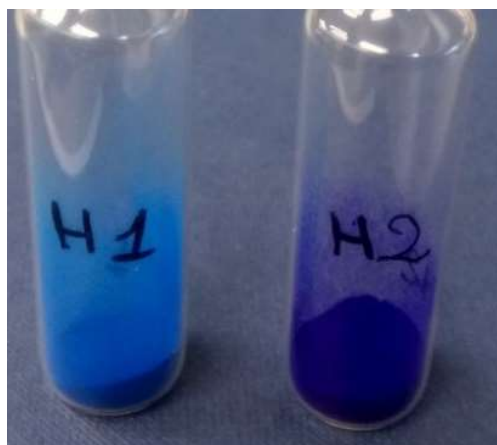

**Figure S2** – Hydrated powder samples before the tableting for H1-40 MPa and H2-40 MPa tablets respectively.

## 2. EPR MEASUREMENTS

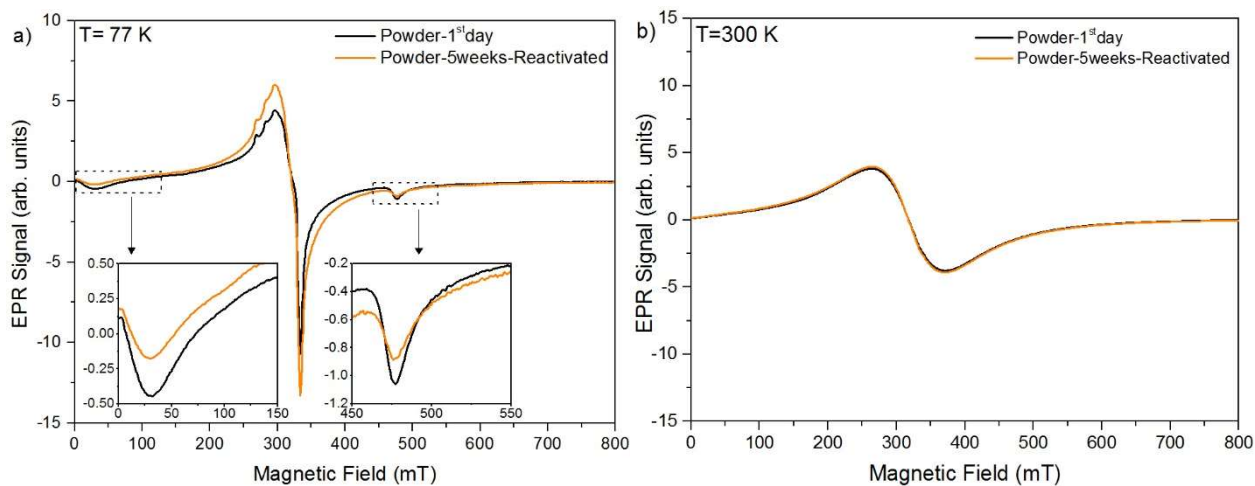

**Figure S3** - EPR spectra acquired at 77 K (a) and 300 K (b) of the Powder sample reactivated after 5 weeks of aging (orange). In black, the corresponding spectra of Powder-1<sup>st</sup> day are also shown for comparison.

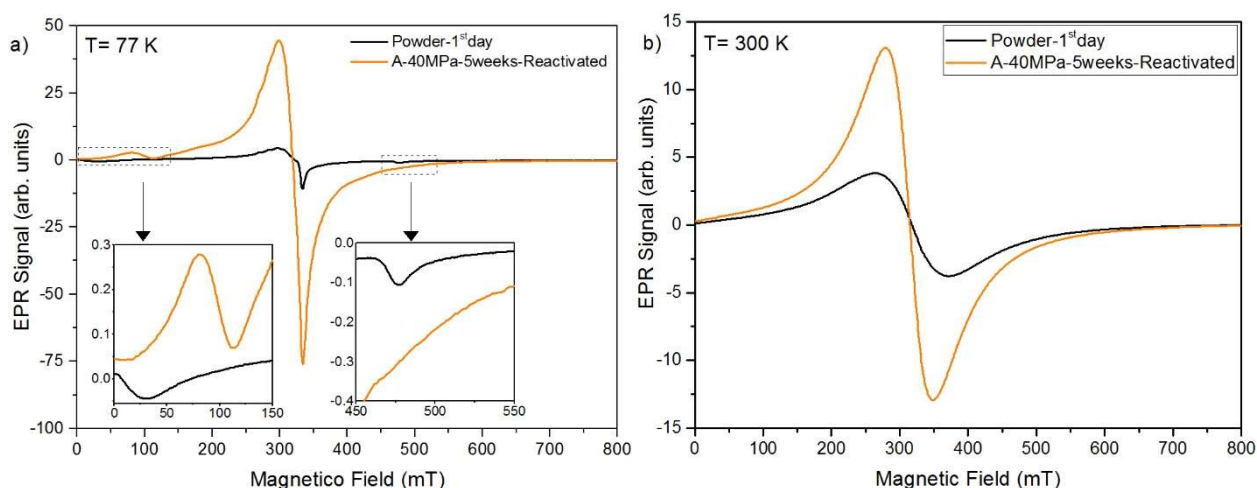

**Figure S4** - EPR spectra acquired at 77 K (a) and 300 K (b) of the sample A-40MPa reactivated after 5 weeks of aging from the tableting (orange). In black, the corresponding spectra of Powder-1<sup>st</sup>day are also shown for comparison.

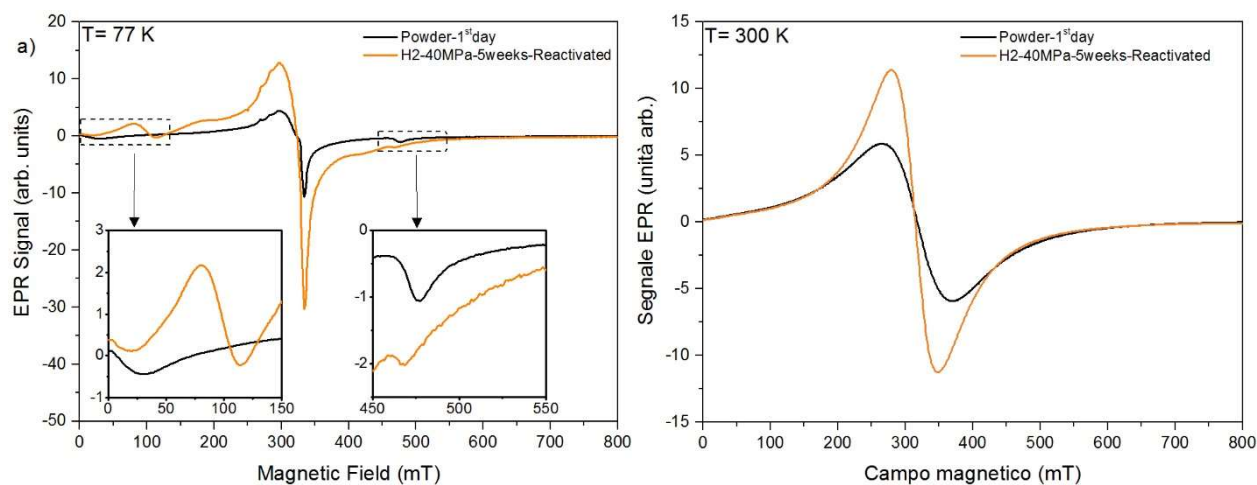

**Figure S5** - EPR spectra acquired at 77 K (a) and 300 K (b) of the sample H2-40MPa reactivated 5 weeks after the tableting (orange). In black, the corresponding spectra of Powder-1<sup>st</sup>day are also shown for comparison.

### 3. OPTICAL AND AFM IMAGES

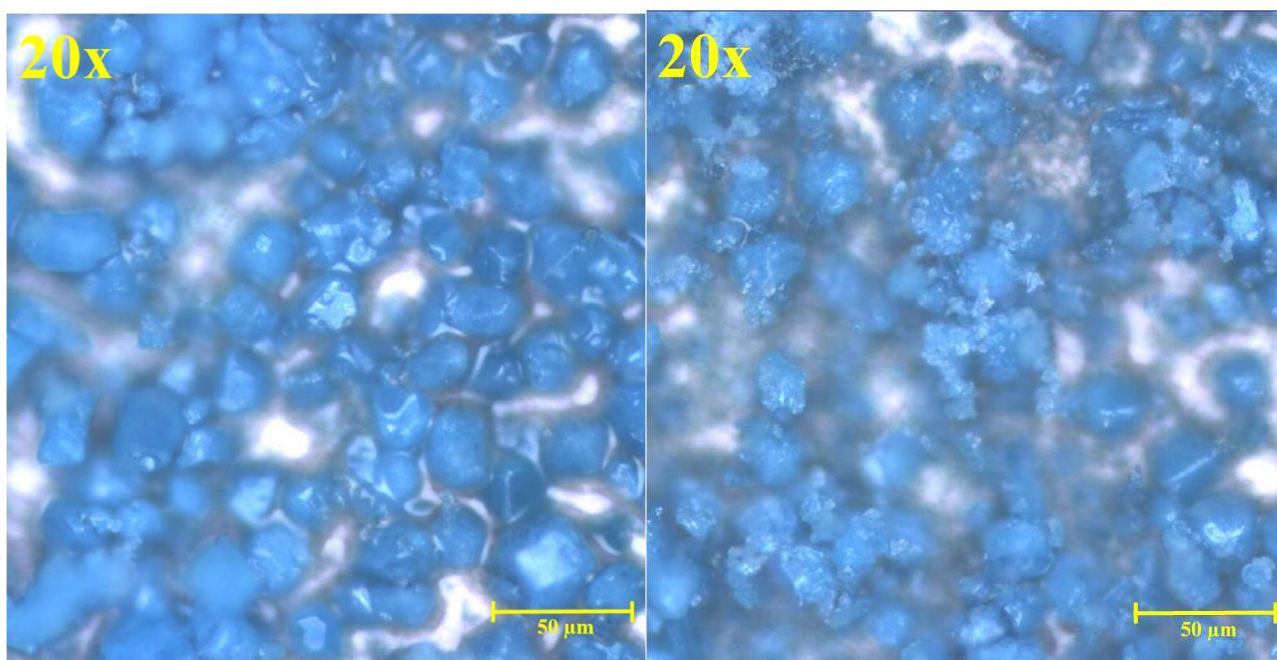

**Figure S6** - 20x optical images of HKUST-1 powder.

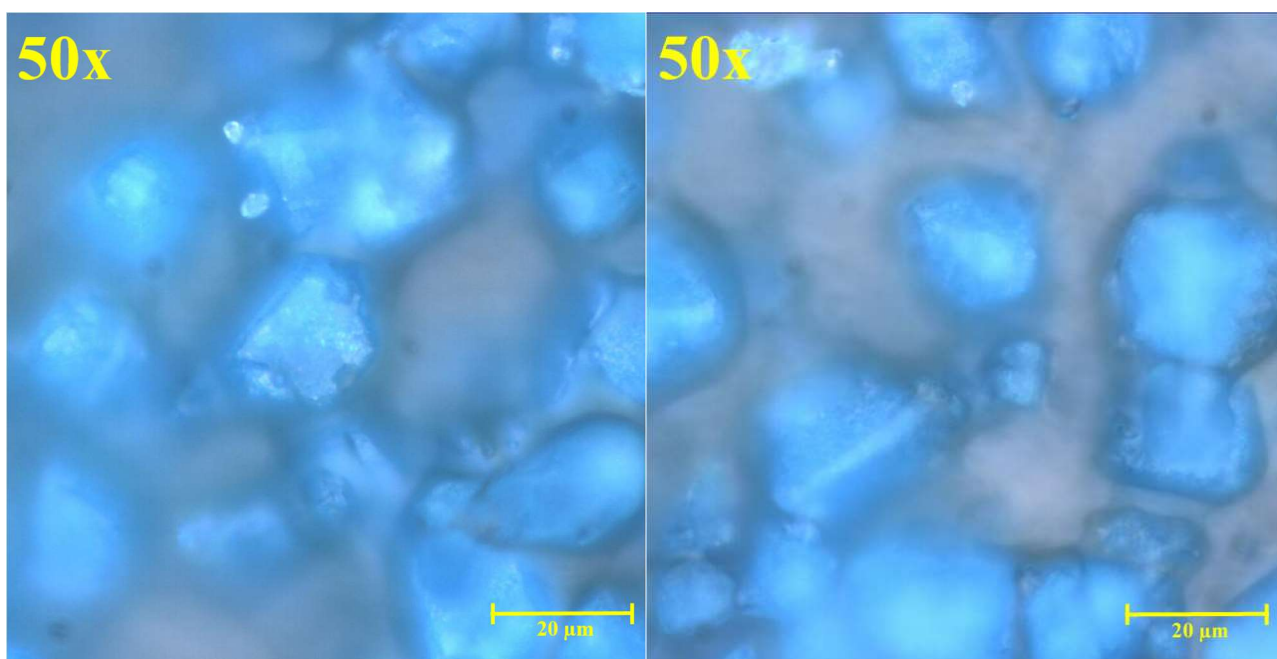

**Figure S7** - 50x optical image of HKUST-1 powder.



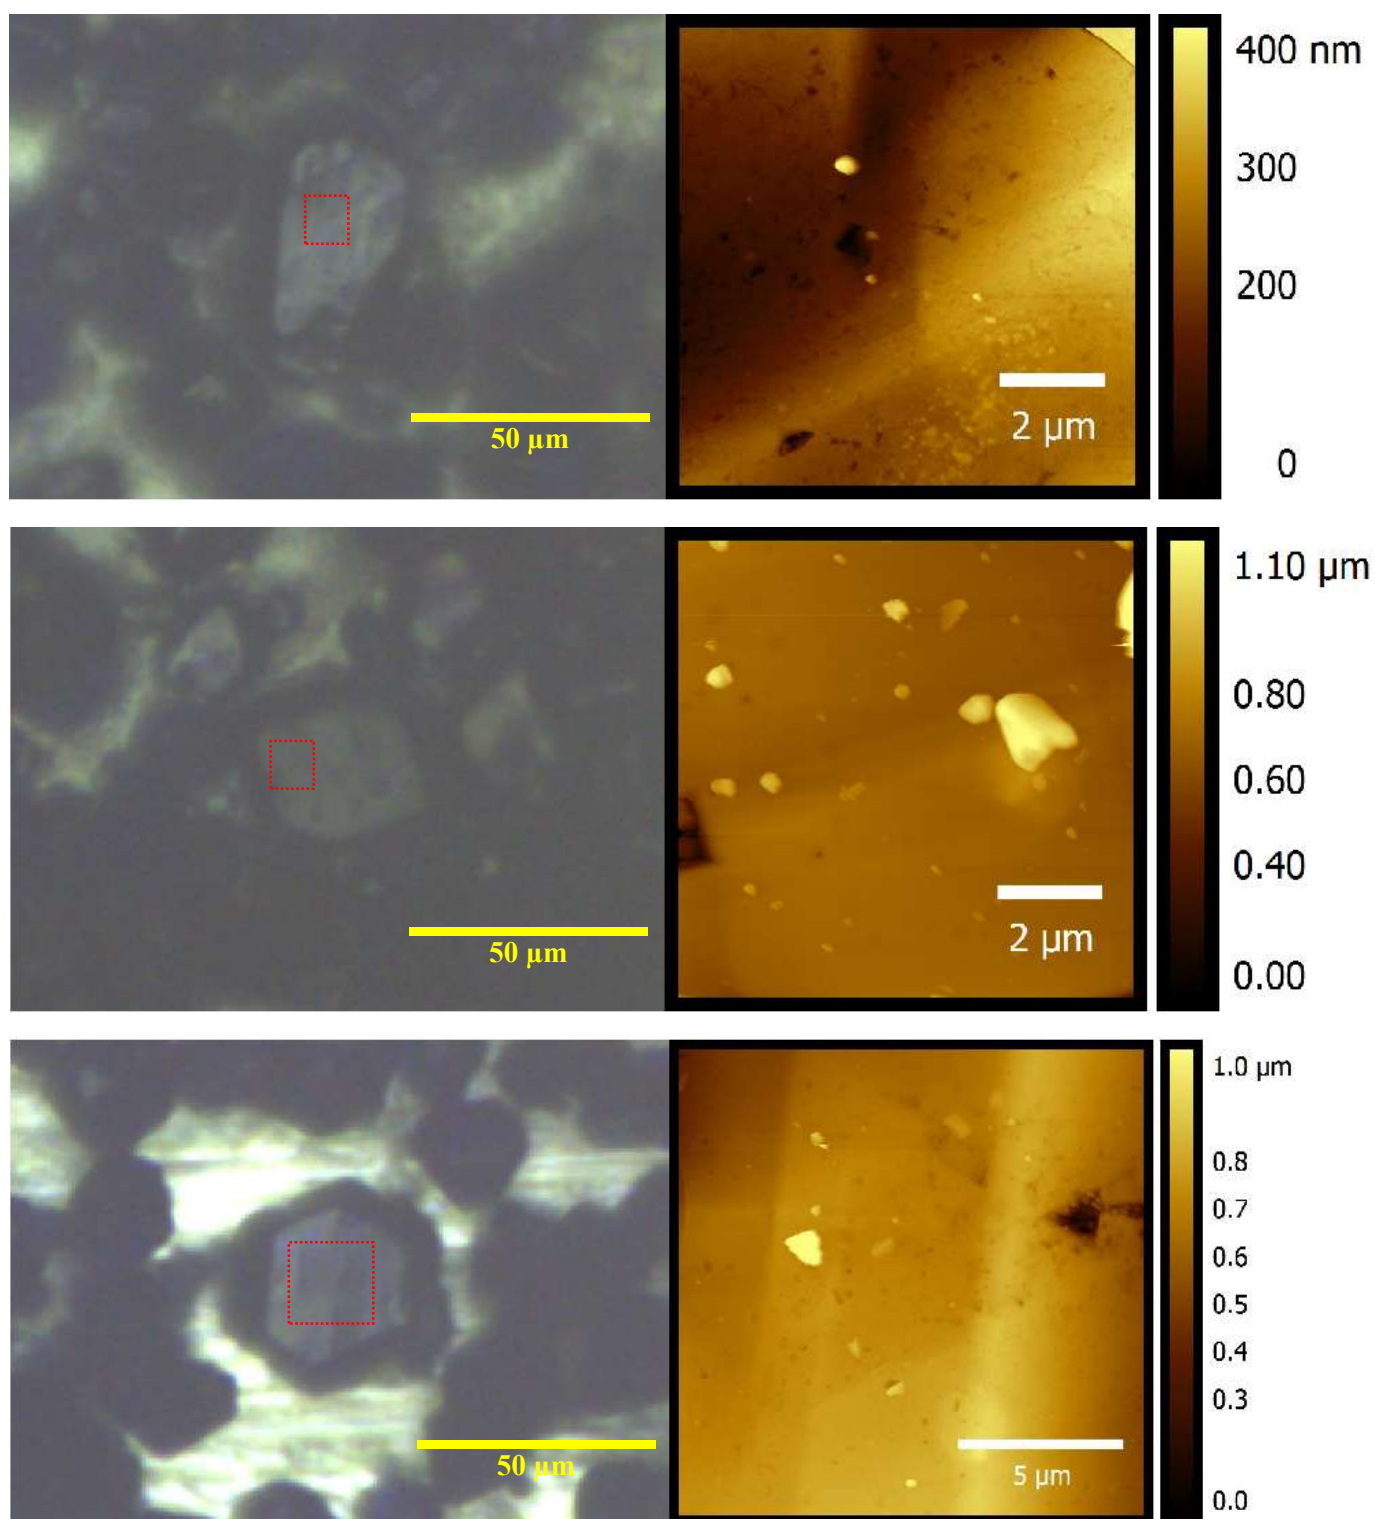

**Figure S8** - Optical and AFM images of HKUST-1 powder.

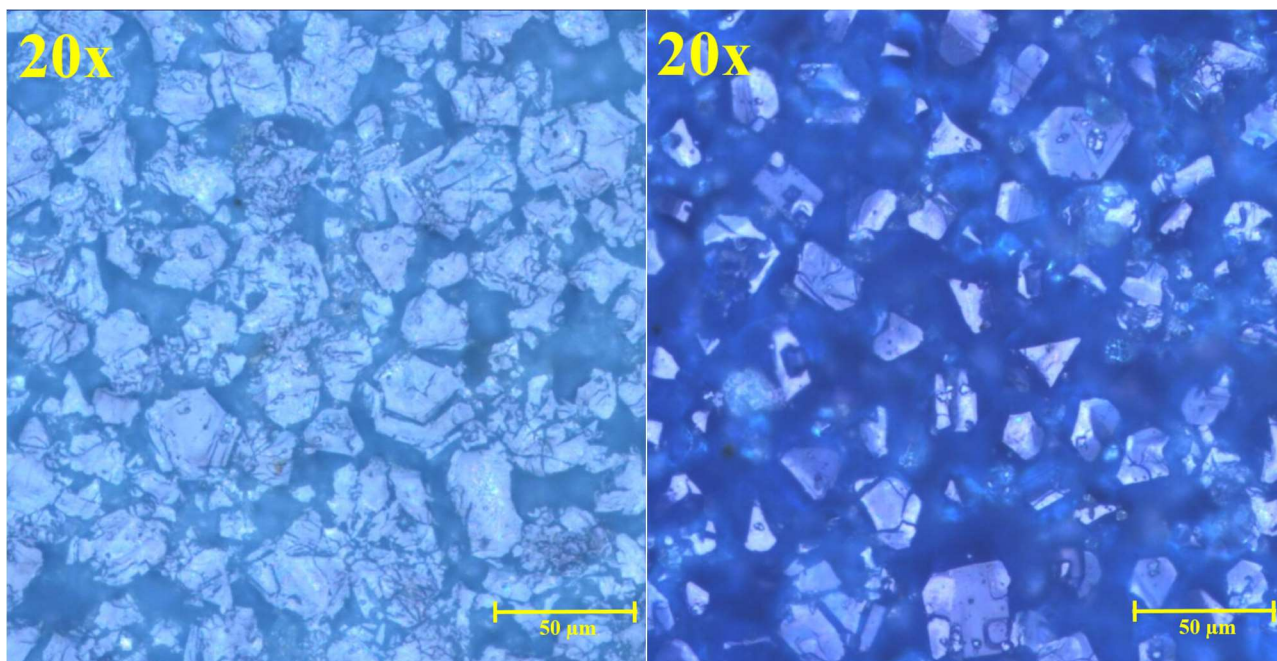

**Figure S9** - 20x optical images of HKUST-1 tablet B-40MPa.

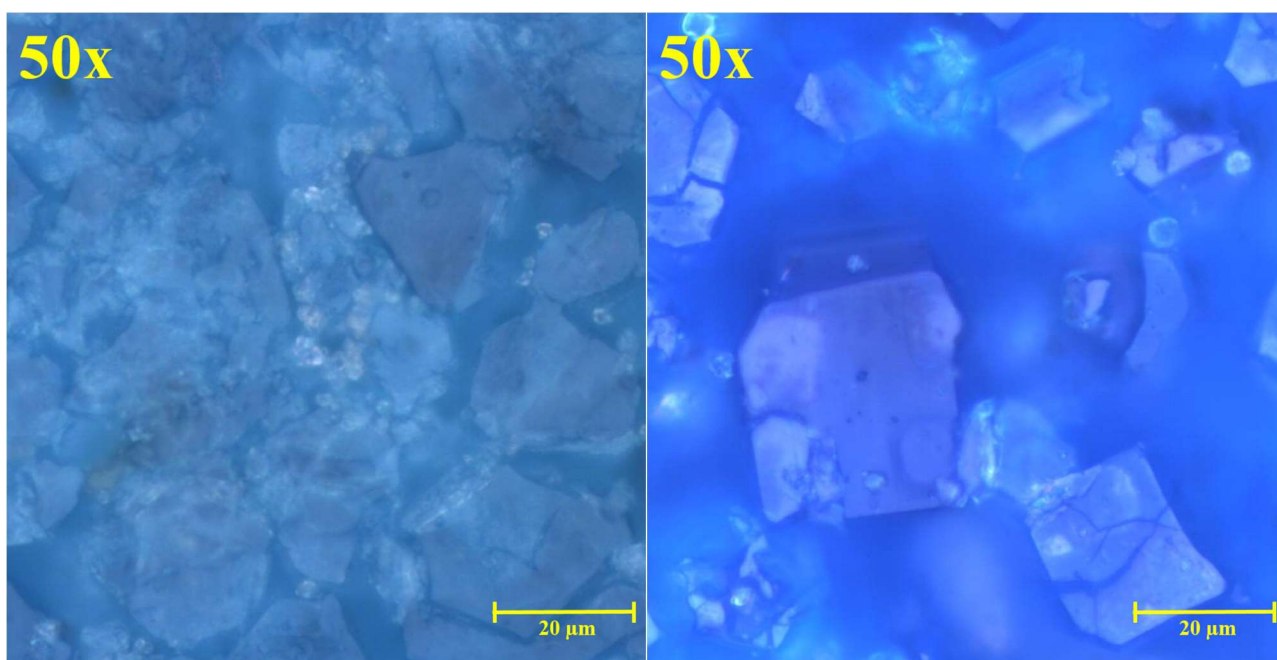

**Figure S10** - 50x optical images of HKUST-1 tablet B-40MPa.



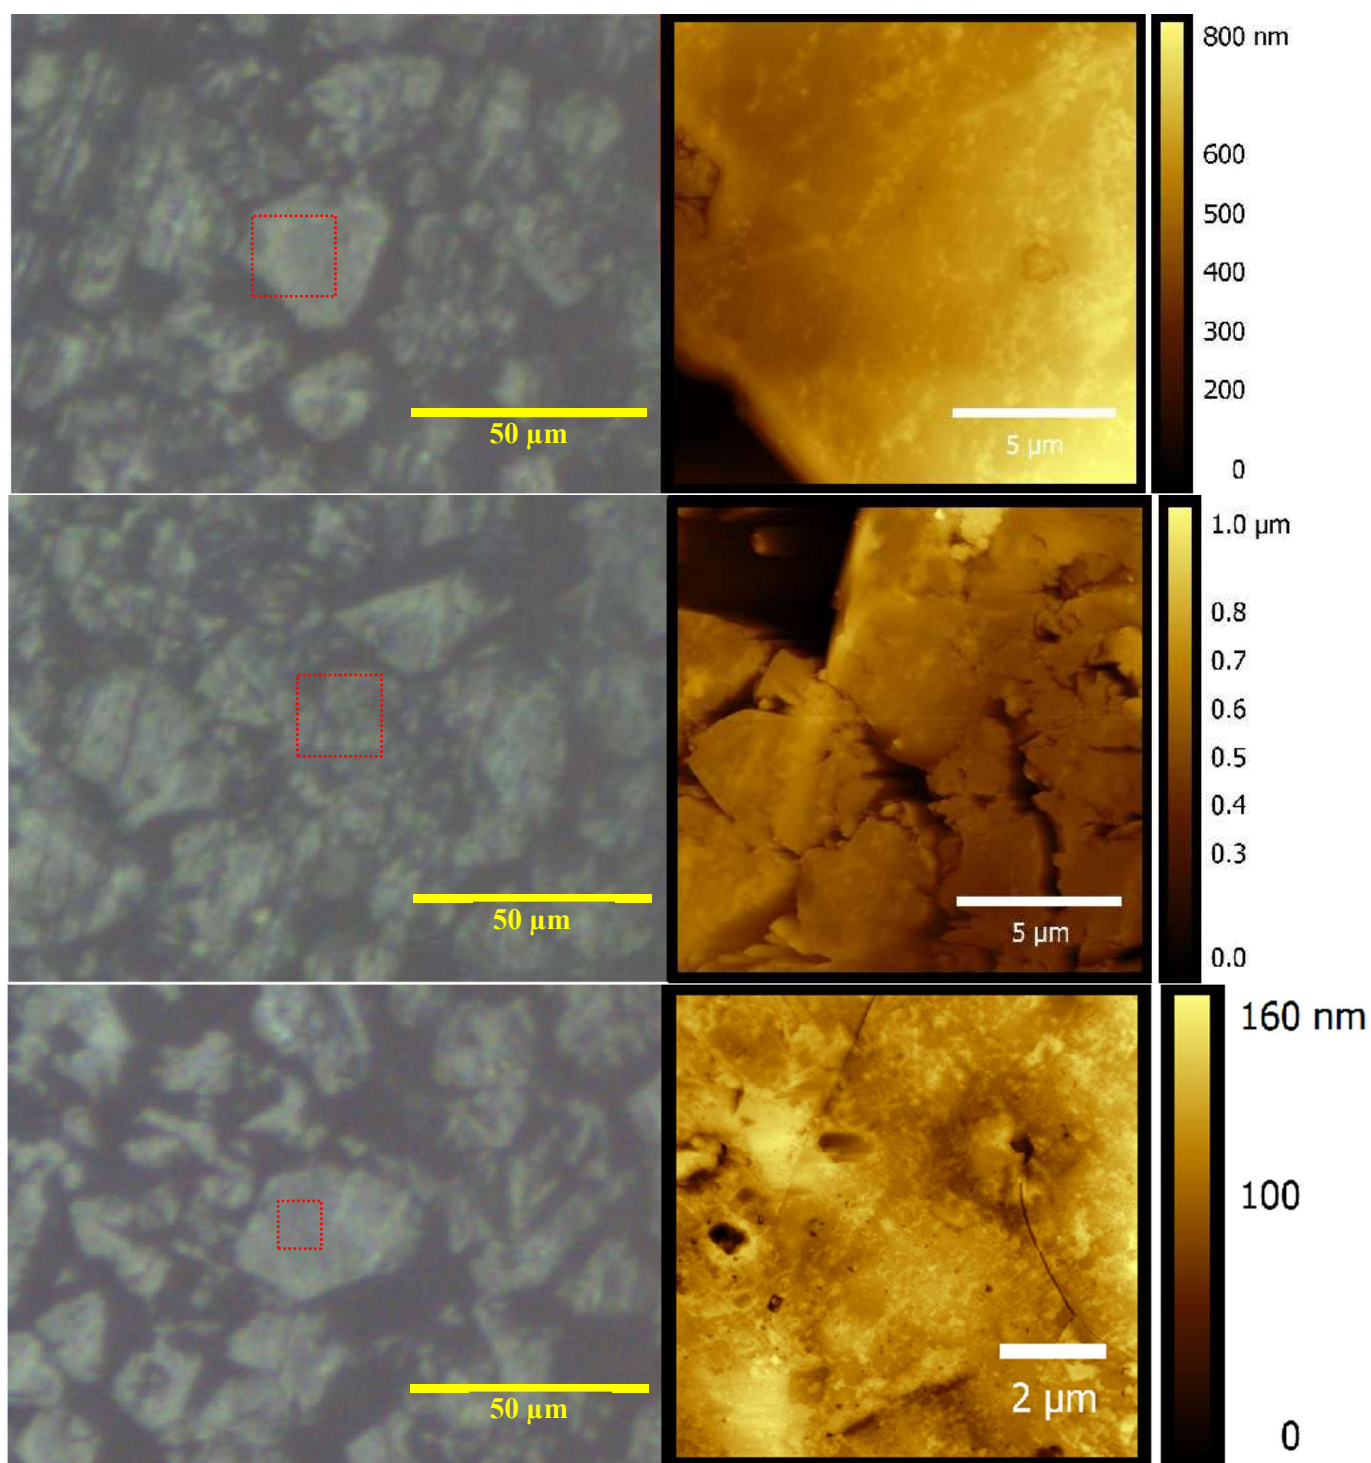

**Figure S11** - Optical and AFM images of HKUST-1 tablet B-40MPa.



## 4. WATER ISOTHERMS

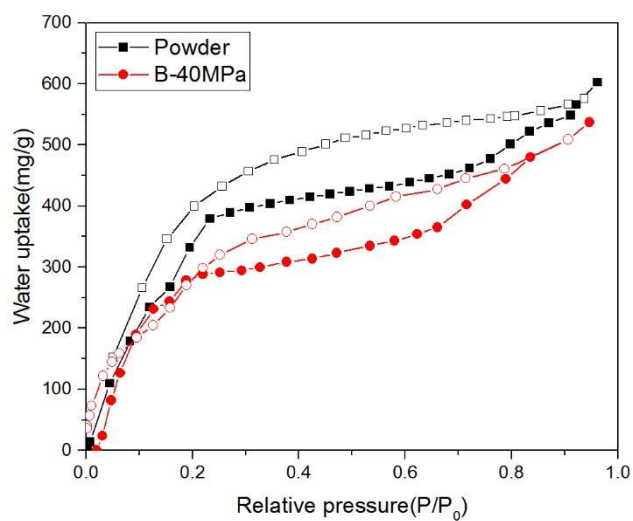

**Figure S12** - Water isotherms of the samples Powder (black squares) and B-40MPa (red circles) measured at 25 °C. Adsorption – full points, desorption – empty points.

## 5. IR SPECTRA

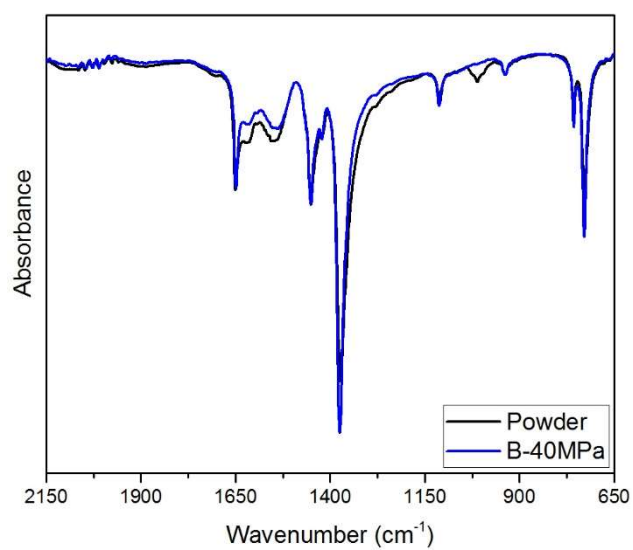

**Figure S13** - IR spectra of the samples Powder (blue) and B-40MPa (black).

## 6. TGA MEASUREMENTS

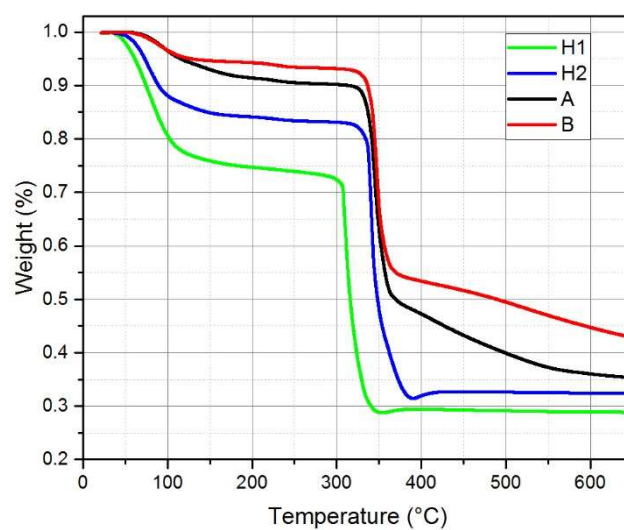

**Figure S14** - Normalized TGA traces of HKUST-1 tablets B-40MPa (red) and A-40MPa (black), and hydrated powder samples H1 (green) and H2 (blue).
